# Supplementary material for: Identification of celastrol as a novel HIV-1 latency reversal agent by an image-based screen
Source: PubMed Central journal article supplement (PMC8084242; doi:10.1371/journal.pone.0244771), 2021-04-29

Non-manipulated image Figure 5 left panel

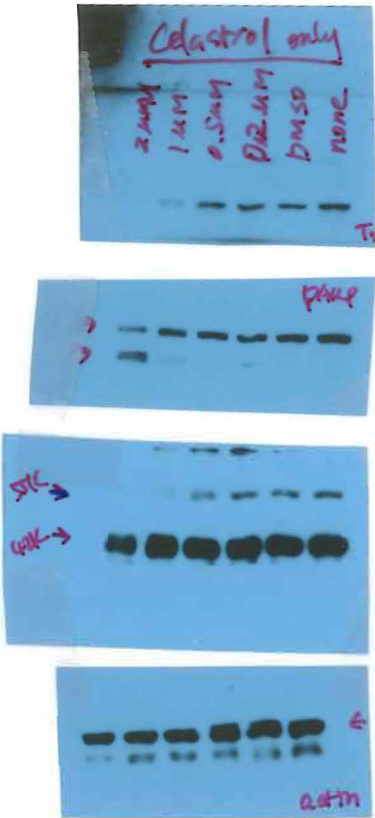

Non-manipulated image Figure 5 middle panel

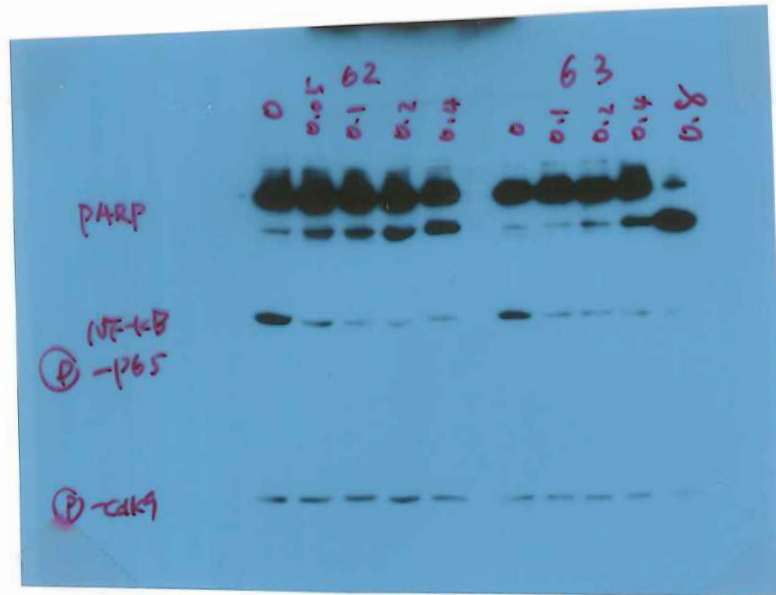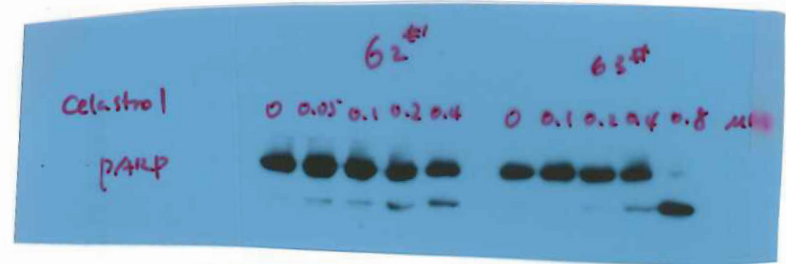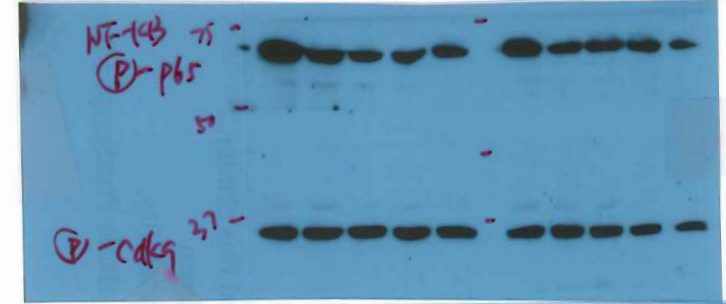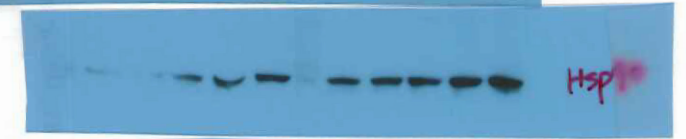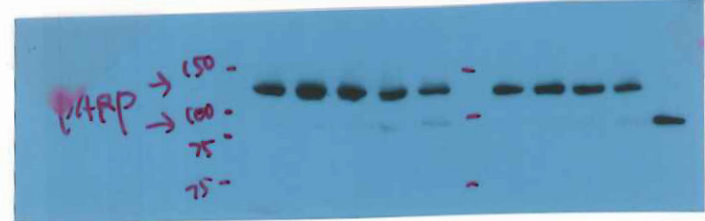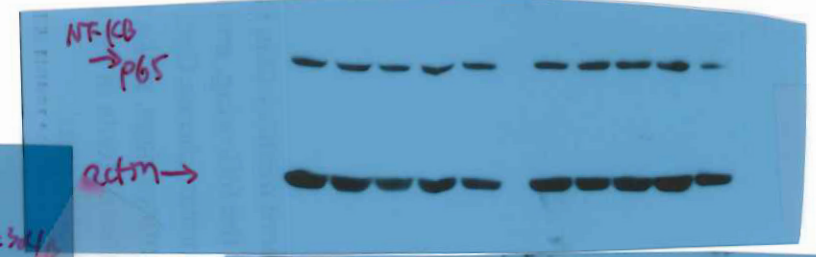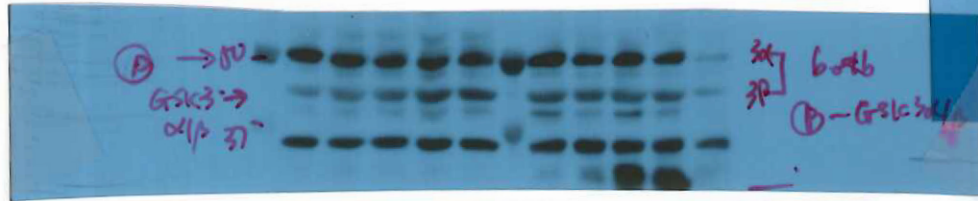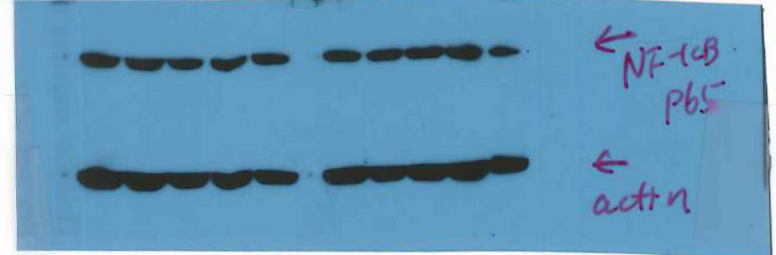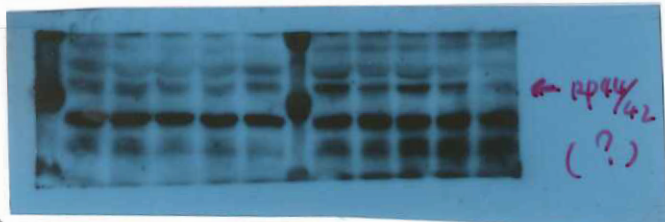

Non-manipulate image Figure 5 right panel

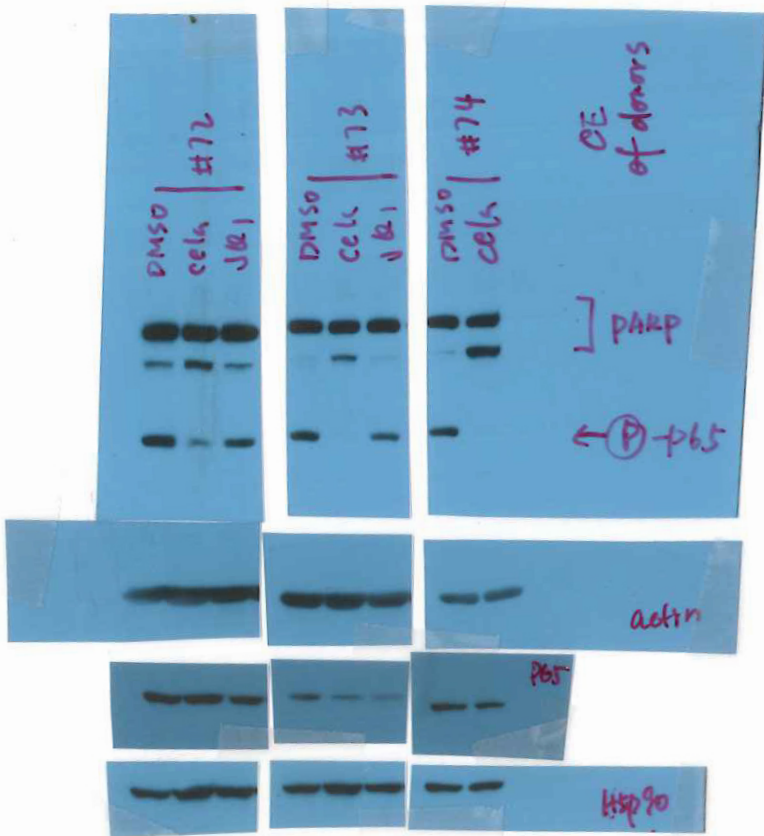

Rabbit -  
NF- $\kappa$ B p65, sc-109 Santa Cruz

phospho-NF- $\kappa$ B-p65 3033S, Cell Signaling  
mouse

3/9/2021

To revise paper

1st try

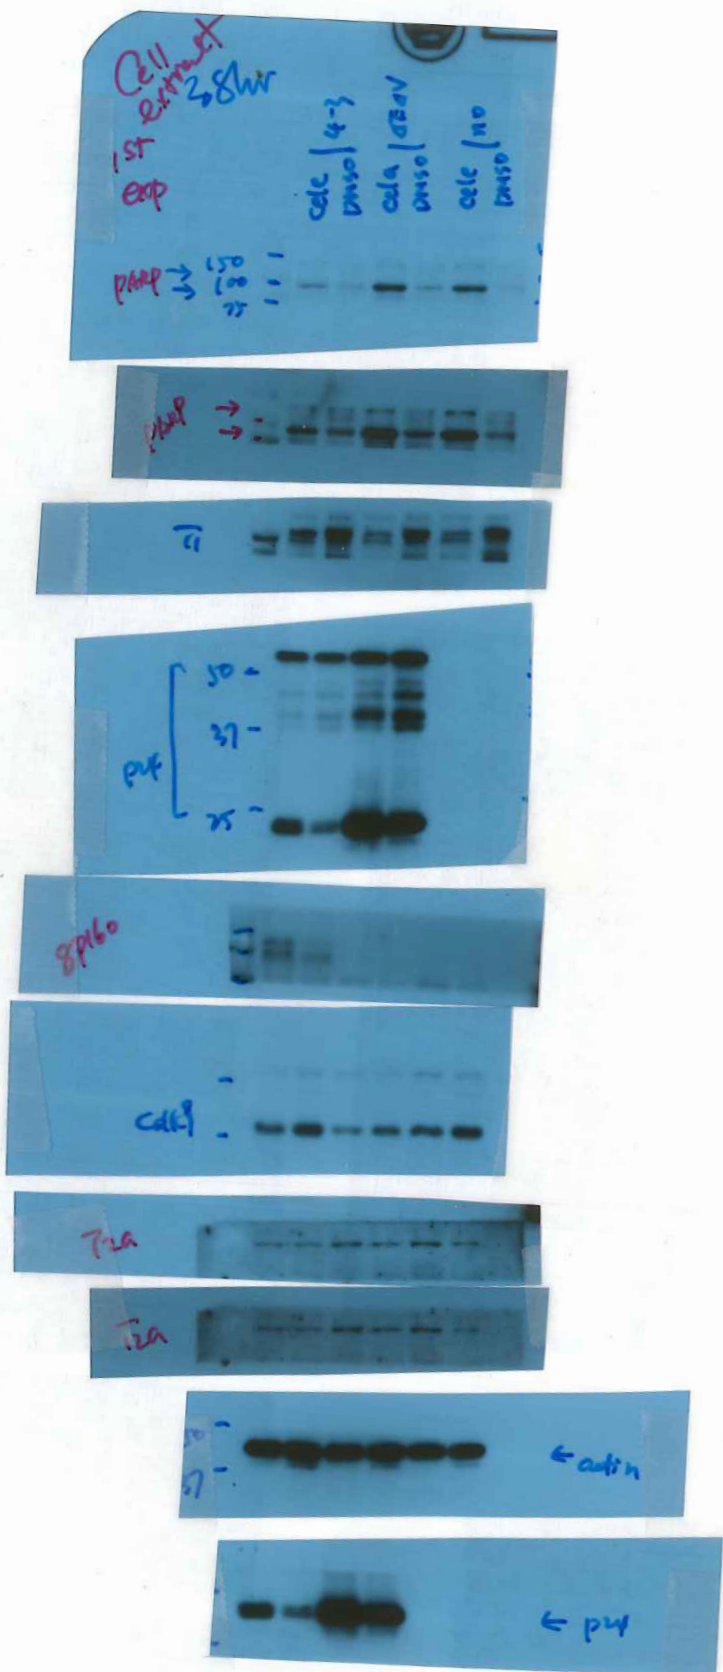

Supplement: pone.0244771.s001.pdf [file pone.0244771.s001.pdf]
